# Supplementary material for: Development of a Nomogram Predicting the Risk of Persistence/Recurrence of Cervical Dysplasia
Source: MDPI journal article supplement (doi:10.3390/vaccines10040579), 2022-04-09
Supplement: s1 [file s1]

**Figure S1: Follow-up after primary conization**

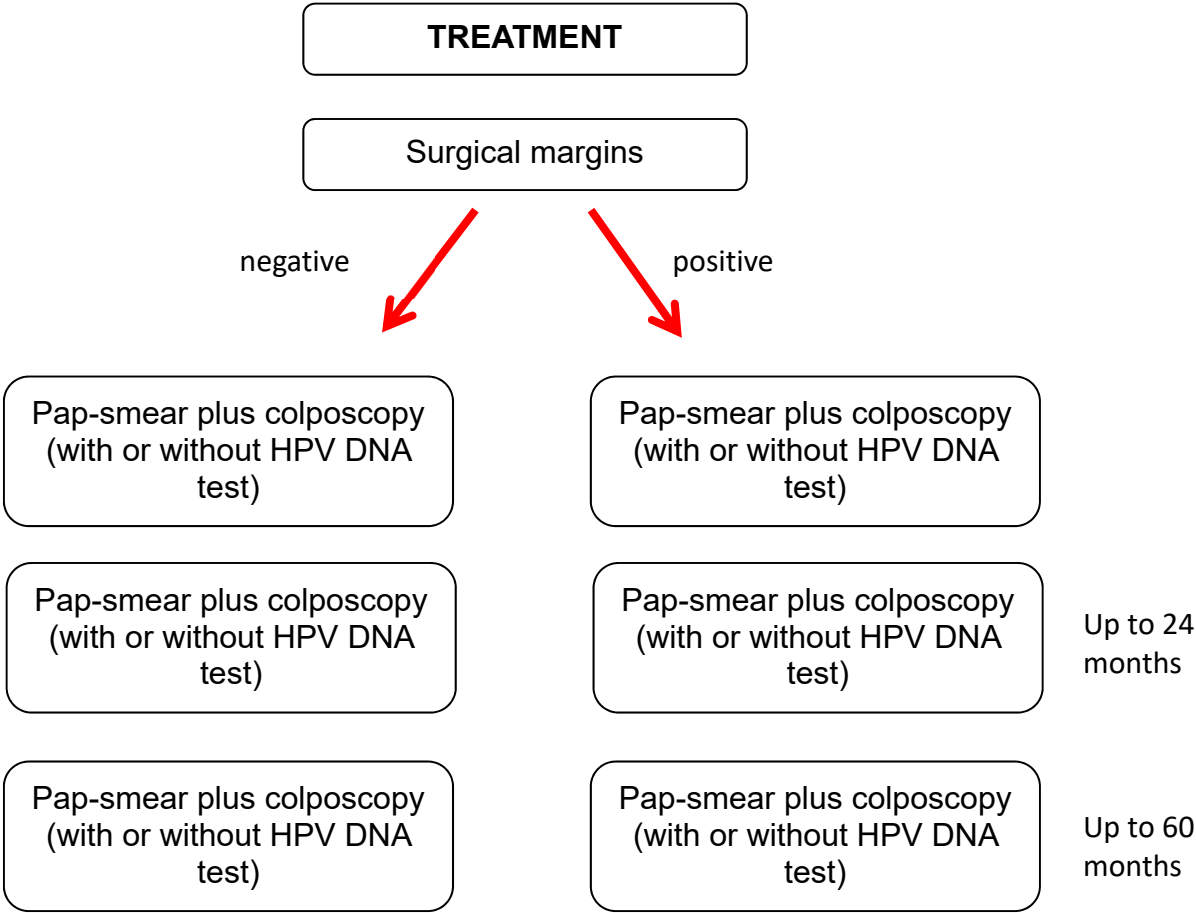

In case of positive results patients had cervical biopsy or endocervical curettage

Figure S2: Risk of persistence/recurrence according to vaccination status

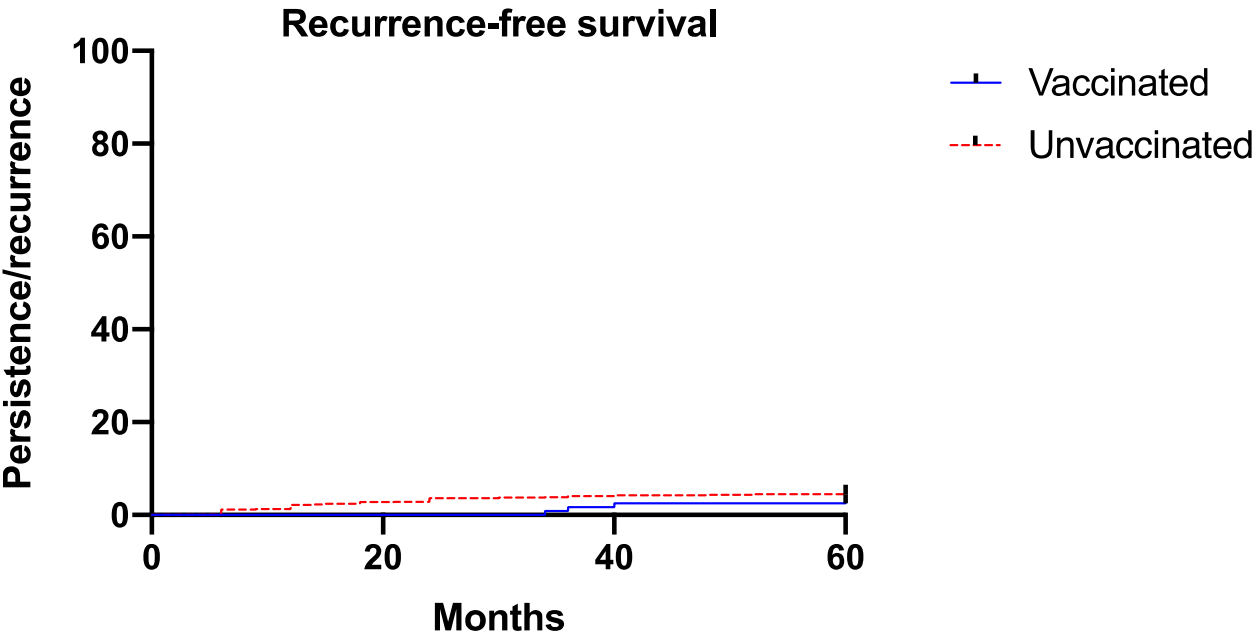

5-year risk of developing cervical dysplasia persistence/recurrence according to the HPV vaccination status (p=0.302)

Figure S3: Risk of persistence/recurrence according to patients' age

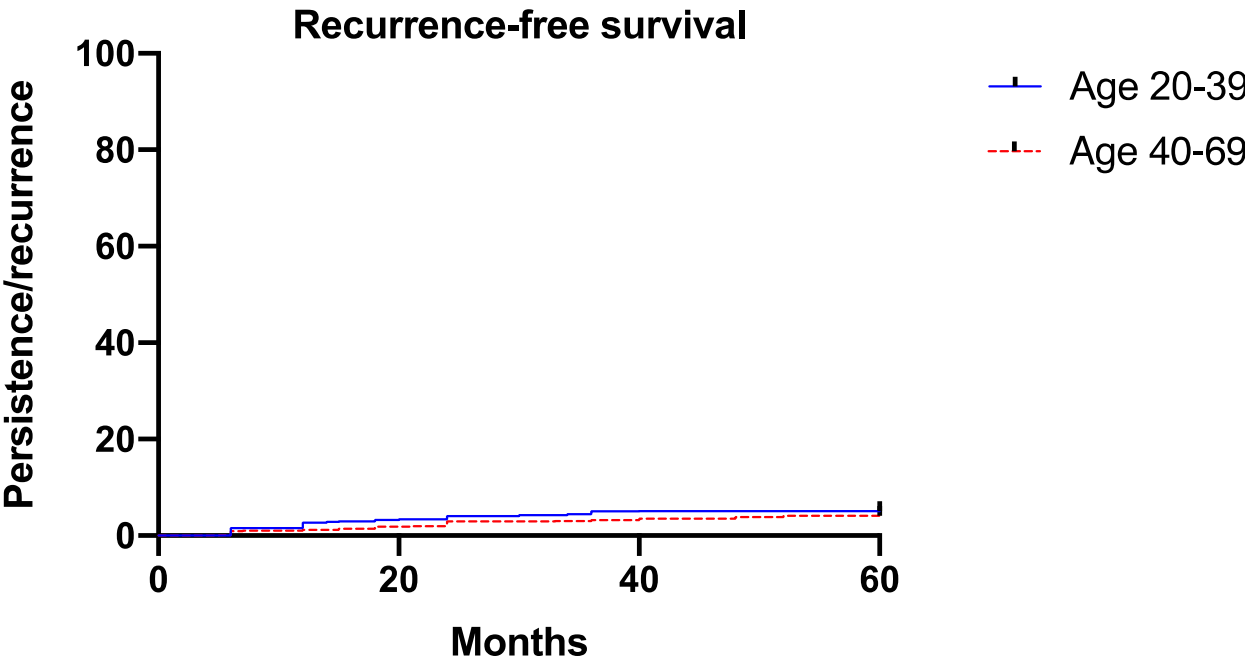

5-year risk of developing cervical dysplasia persistence/recurrence according patients' age  
( $p=0.218$ )

**Figure S4: Diagnostic performance of the model**

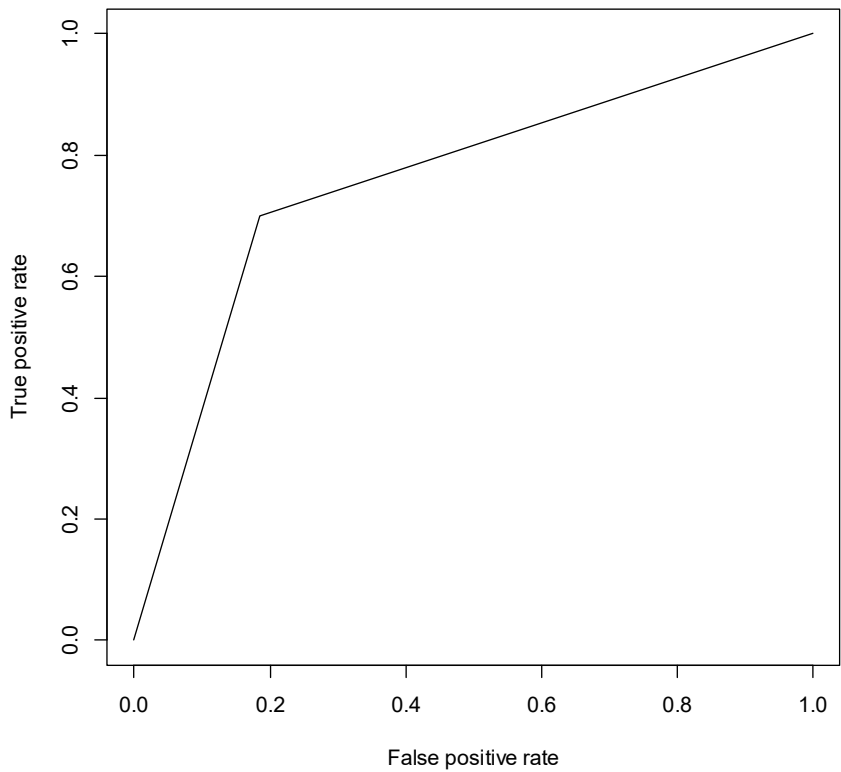

**AUC= 0.7576433**

**Figure S5 : Predictive value of the model**

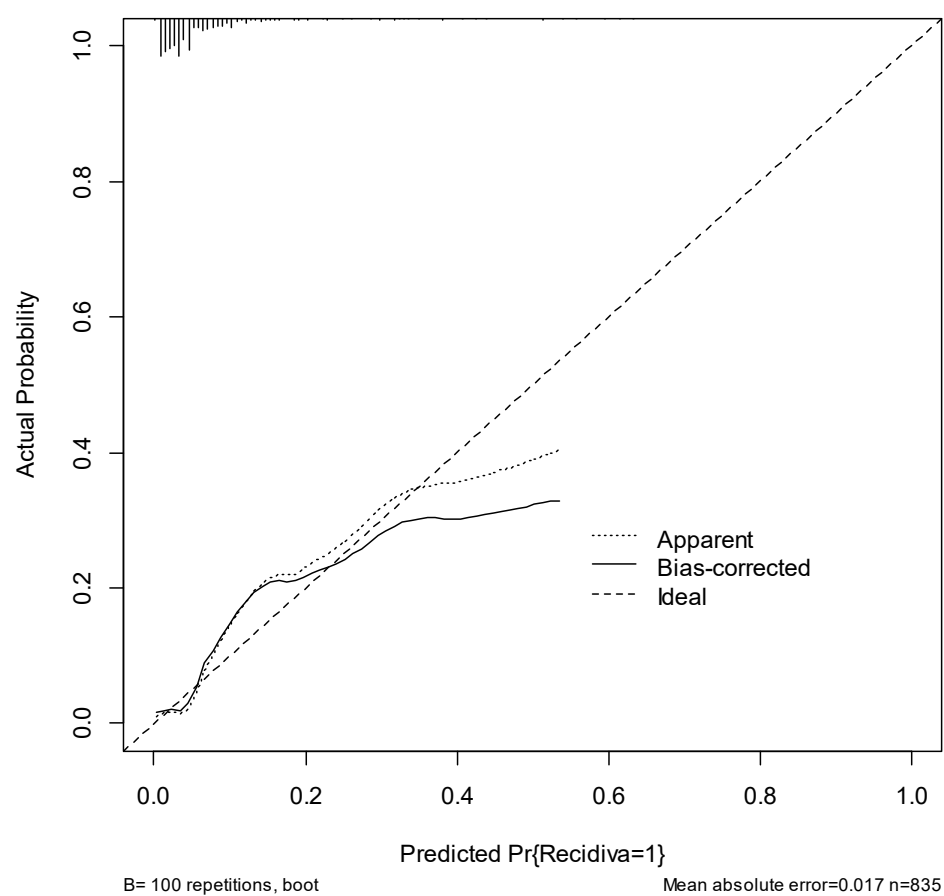

Mean absolute error=0.017    Mean squared error=0.00069  
0.9 Quantile of absolute error=0.042

**Table S1: Logistic model**

| Model Likelihood |            | Discrimination |         | Rank  |
|------------------|------------|----------------|---------|-------|
|                  | Ratio Test |                | Indexes |       |
| LR chi2          | 56.08      | R2             | 0.190   | C     |
| d.f.             | 9          | G              | 1.283   | Dxy   |
| Pr(> chi2)       | <0.0001    | Gr             | 3.607   | Gamma |
|                  |            | Gp             | 0.058   | Tau-a |
|                  |            | Brier          | 0.046   |       |

**Table S2: Risk assessment according to various variables.**

| <b>Variables</b>      | <b>Value</b>     | <b>Points</b> |
|-----------------------|------------------|---------------|
| Age                   | 10               | 100           |
|                       | 20               | 88            |
|                       | 30               | 75            |
|                       | 40               | 63            |
|                       | 50               | 50            |
|                       | 60               | 38            |
|                       | 70               | 25            |
|                       | 80               | 13            |
|                       | 90               | 0             |
| Reason for conization | CIN2             | 0             |
|                       | CIN3             | 29            |
| HPV type involved     | 16/18            | 56            |
|                       | Other high-risk  | 63            |
|                       | No high-risk     | 0             |
| Surgical procedure    | LEEP             | 10            |
|                       | Laser conization | 0             |
| Ectocervical margins  | Negative         | 0             |
|                       | Positive         | 14            |
| Endocervical margins  | Negative         | 0             |
|                       | Positive         | 44            |
| HPV persistence       | No               | 0             |
|                       | Yes              | 25            |
| Adjuvant vaccination  | No               | 65            |
|                       | Yes              | 0             |

**Table S3: Risk of recurrence according to the nomogram**

| <b>Total Points</b> | <b>Risk of recurrence</b> |
|---------------------|---------------------------|
| 144                 | 0.005                     |
| 209                 | 0.050                     |
| 230                 | 0.100                     |
| 252                 | 0.200                     |
| 267                 | 0.300                     |
| 279                 | 0.400                     |
| 290                 | 0.500                     |
| 301                 | 0.600                     |
| 314                 | 0.700                     |



**Table S4: Baseline characteristics of the validation cohort**

|                              | Study population (n=549) |
|------------------------------|--------------------------|
| Age, years                   | 46 (19, 71)              |
| BMI                          | 23 (17, 41.0)            |
| Menopause                    |                          |
| No                           | 355 (64.7%)              |
| Yes                          | 194 (35.3%)              |
| Reason for conization        |                          |
| CIN2                         | 139 (25.3%)              |
| CIN3                         | 410 (74.7%)              |
| HR HPV involved              |                          |
| No                           | 49 (8.9%)                |
| Yes                          | 500 (91.7%)              |
| Positive margins             |                          |
| Endocervical                 | 33 (6.0%)                |
| Ectocervical                 | 23 (4.2%)                |
| Vaccination after conization |                          |
| No                           | 498 (90.7%)              |
| Yes                          | 51 (9.3%)                |
| HPV persistence              |                          |
| No                           | 401 (73.1%)              |
| Yes                          | 148 (26.9%)              |

Data are reported as median (range) and number (%); Abbreviation: BMI, body mass index; CIN, cervical intraepithelial neoplasia; HPV, human papillomavirus
